# Supplementary material for: The Third French Alzheimer Plan: analysis of the influence of a national public health initiative on scientific research productivity and impact
Source: PubMed Central journal article supplement (PMC4584022; doi:10.1186/s13195-015-0144-z), 2015-09-26
Supplement: 13195_2015_144_MOESM1_ESM.pdf [file 13195_2015_144_MOESM1_ESM.pdf]

| Funding research (€ 000s)               | Total   | CHU**  | RPOs*** |
|-----------------------------------------|---------|--------|---------|
| PHRC projects                           | 24 686  | 24 686 |         |
| ANR projects                            | 34 107  | 2 196  | 31 911  |
| Foundation programmes:                  |         |        |         |
| - <i>Project applications</i>           | 8 481   | 1 740  | 6 741   |
| - <i>Post-doctoral positions</i>        | 3 266   |        | 3 266   |
| - <i>GWAS<sup>a</sup></i>               | 3 997   |        | 3 997   |
| - <i>Three cities study<sup>b</sup></i> | 2 298   |        | 2 298   |
| - <i>CATF<sup>c</sup></i>               | 9 000   |        | 9 000   |
| - <i>Memento cohort<sup>d</sup></i>     | 14 828  | 10 730 | 4 098   |
| Total foundation:                       | 41 870  | 12470  | 29400   |
| Training and education <sup>e</sup>     |         |        |         |
| Centre for early onset                  |         |        |         |
| Alzheimer Disease                       | 3 000   | 3 000  |         |
| (CNRMAJ) <sup>f</sup>                   |         |        |         |
| National data bank for                  |         |        |         |
| Alzheimer Disease patients              | 6 504   | 6 504  |         |
| (Nice CM2R) <sup>g</sup>                |         |        |         |
| Global funding                          | 125 579 | 48 856 | 61 311  |
| Total                                   | 101 751 |        |         |

Figure 1(a)

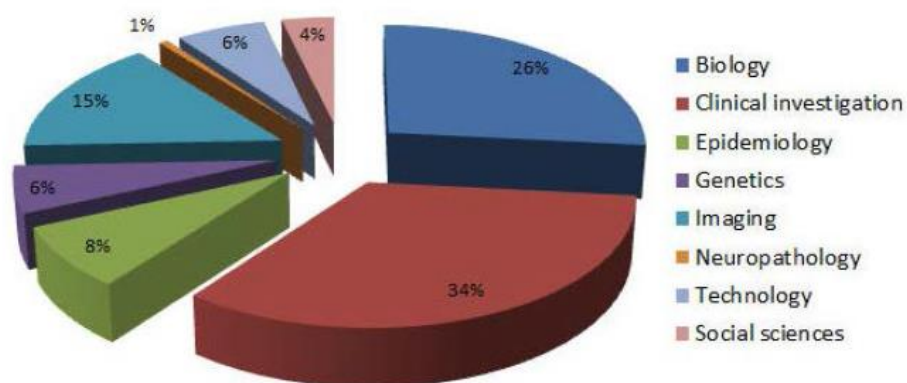

Figure 1(b)
